# Supplementary material for: Effects of Blood Flow Restriction Combined with Low-Intensity Resistance Training on Lower-Limb Muscle Strength and Mass in Post-Middle-Aged Adults: A Systematic Review and Meta-Analysis
Source: MDPI journal article supplement (doi:10.3390/ijerph192315691), 2022-11-25
Supplement: s1 [file s1]

Supplementary Materials

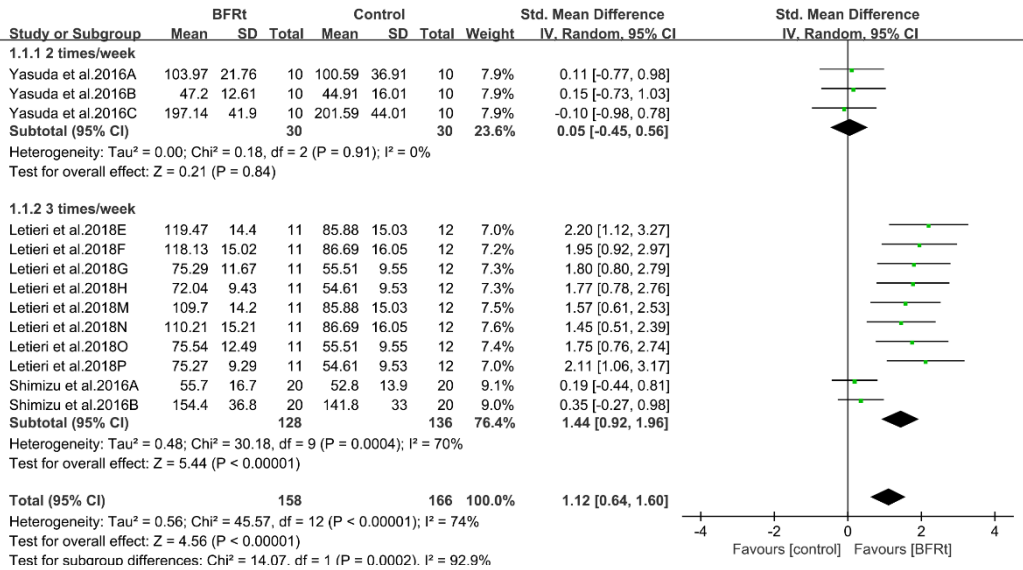

Figure S1. Forest plot for volume equated studies in different frequencies [29,35,37].
